# Supplementary material for: Effects of simvastatin on white matter integrity in healthy middle‐aged adults
Source: PubMed Central journal article supplement (PMC8351379; doi:10.1002/acn3.51421), 2021-07-18

## Supplemental Material

### Effects of simvastatin on white matter integrity in healthy middle-aged adults: a secondary analysis of a randomized controlled trial

Nicholas M Vogt, PhD; Jack F V Hunt, PhD; Yue Ma, PhD; Carol A Van Hulle, PhD; Nagesh Adluru, PhD; Richard J Chappell, PhD; Karen K Lazar, MS; Laura E Jacobson, MPH; Benjamin P Austin, PhD; Sanjay Asthana, MD; Sterling C Johnson, PhD; Barbara B Bendlin, PhD; Cynthia M Carlsson, MD, MS\*

**Supplemental Table 1.** Baseline participant characteristics for full study population (n=88)

| Characteristic                      | Participants, No. (%)  |                    |         |
|-------------------------------------|------------------------|--------------------|---------|
|                                     | Placebo (n=44)         | Simvastatin (n=44) | P Value |
| Age, mean (SD), y                   | 54.8 (7.8)             | 56.2 (6.5)         | 0.36    |
| Female sex                          | 32 (74.4)              | 31 (70.5)          | >0.99   |
| White/Caucasian race                | 43 (97.7) <sup>a</sup> | 44 (100)           | >0.99   |
| APOE-ε4 positive                    | 17 (38.6)              | 17 (38.6)          | >0.99   |
| ASCVD 10-y risk score, median [IQR] | 2.2 [1.0-3.8]          | 2.9 [1.4-4.4]      | 0.24    |
| BMI, mean (SD)                      | 27.6 (5.6)             | 27.2 (5.6)         | 0.75    |
| Blood pressure                      |                        |                    |         |
| Systolic, mean (SD), mm Hg          | 124 (17)               | 125 (16)           | 0.69    |
| Diastolic, mean (SD), mm Hg         | 73 (11)                | 72 (9.9)           | 0.85    |
| Serum lipid profile (fasting)       |                        |                    |         |
| Total cholesterol, mean (SD), mg/dL | 207 (34)               | 207 (36)           | 0.94    |
| Triglycerides, mean (SD), mg/dL     | 102 (40)               | 112 (58)           | 0.32    |
| HDL-C, mean (SD), mg/dL             | 63 (17)                | 63 (21)            | 0.82    |
| LDL-C, mean (SD), mg/dL             | 123 (28)               | 122 (28)           | 0.93    |

Abbreviations: APOE, apolipoprotein E; ASCVD, atherosclerotic cardiovascular disease; BMI, body mass index; HDL-C, high-density lipoprotein cholesterol; LDL-C, low-density lipoprotein cholesterol

<sup>a</sup>One American Indian/Native American participant in placebo group

**Supplemental Table 2.** Summary of ANCOVA models for effect of simvastatin treatment on diffusion tensor imaging measures

| Variable                   | 6 months<br>β coefficient (SE) |                 |                 |                 | 12 months<br>β coefficient (SE) |                  |                  |                 | 18 months<br>β coefficient (SE) |                 |                                |                 |
|----------------------------|--------------------------------|-----------------|-----------------|-----------------|---------------------------------|------------------|------------------|-----------------|---------------------------------|-----------------|--------------------------------|-----------------|
|                            | FA                             | MD              | RD              | AD              | FA                              | MD               | RD               | AD              | FA                              | MD              | RD                             | AD              |
| Treatment – simvastatin    | -0.02<br>(0.28)                | 0.44<br>(0.48)  | 0.47<br>(0.54)  | 0.42<br>(0.43)  | 0.07<br>(0.37)                  | 0.0005<br>(0.50) | -0.002<br>(0.59) | 0.008<br>(0.43) | <b>0.88**</b><br><b>(0.31)</b>  | -0.79<br>(0.44) | <b>-1.10*</b><br><b>(0.52)</b> | -0.48<br>(0.39) |
| Age                        | -0.03<br>(0.02)                | 0.06<br>(0.03)  | 0.07<br>(0.04)  | 0.05<br>(0.03)  | 0.002<br>(0.03)                 | 0.01<br>(0.04)   | 0.01<br>(0.04)   | 0.01<br>(0.03)  | 0.02<br>(0.02)                  | 0.05<br>(0.03)  | 0.04<br>(0.04)                 | 0.05<br>(0.03)  |
| Sex – Male                 | 0.24<br>(0.32)                 | -0.43<br>(0.54) | -0.50<br>(0.61) | -0.35<br>(0.49) | -0.19<br>(0.42)                 | -0.007<br>(0.56) | 0.10<br>(0.67)   | -0.10<br>(0.48) | <b>-0.81*</b><br><b>(0.35)</b>  | 0.24<br>(0.50)  | 0.55<br>(0.59)                 | -0.07<br>(0.44) |
| <i>APOE</i> -ε4 – positive | -0.07<br>(0.29)                | 0.17<br>(0.50)  | 0.19<br>(0.56)  | 0.15<br>(0.45)  | -0.18<br>(0.39)                 | 0.66<br>(0.52)   | 0.72<br>(0.62)   | 0.59<br>(0.45)  | <b>0.67*</b><br><b>(0.32)</b>   | 0.09<br>(0.46)  | -0.19<br>(0.54)                | 0.37<br>(0.40)  |

Abbreviations: *APOE*, apolipoprotein E; FA, fractional anisotropy; MD, mean diffusivity; RD, radial diffusivity; AD, axial diffusivity; SE, standard error

\*  $P < 0.05$ , \*\*  $P < 0.01$

**Supplemental Figure 1.** Region of interest (ROI) analysis showing 18-month percent change in WM DTI measures. Points represent mean ( $\pm$  SEM) for each ROI (averaged bilaterally, except for forceps major and forceps minor). \* $P < 0.05$  (uncorrected); ANCOVA models controlling for age, sex, *APOE- $\epsilon$ 4* genotype. Abbreviations: ATR, Anterior thalamic radiation; CST, corticospinal tract; CCG, cingulum cingulate gyrus; CHB, cingulum hippocampal bundle; IFOF, inferior fronto-occipital fasciculus; ILF, inferior longitudinal fasciculus; SLF, superior longitudinal fasciculus; UF, uncinate fasciculus; SLFT, superior longitudinal fasciculus (temporal part); Fmaj, forceps major; Fmin, forceps minor

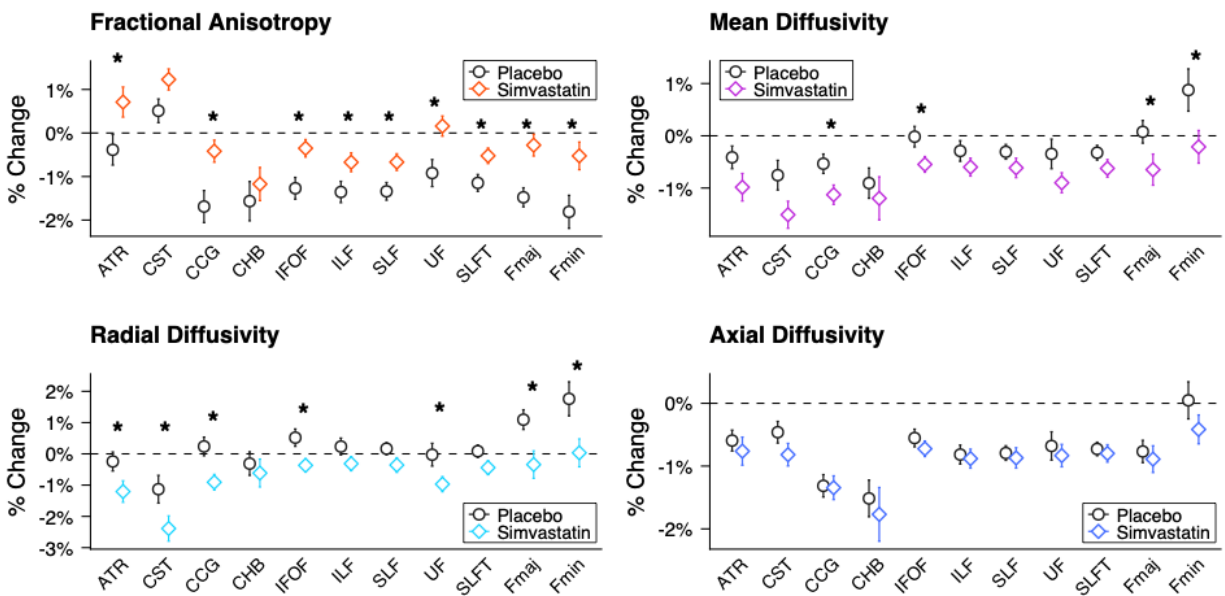

**Supplemental Figure 2.** Exploratory voxel-based morphometry (VBM) analyses of 12- and 18-month percent change in WM volume (Simvastatin > Placebo,  $P_{\text{uncorr}} < 0.01$ ,  $n = 10,000$  permutations followed by threshold-free cluster enhancement).

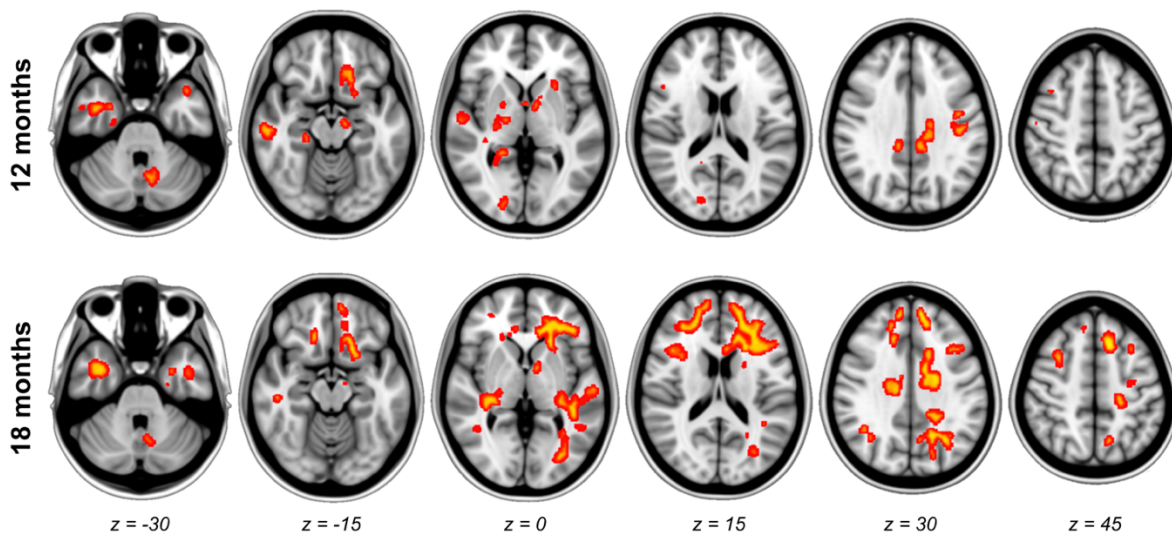

**Supplemental Figure 3.** 18-month percent change in total cholesterol vs. 18-month change in DTI neuroimaging measures. Abbreviations: FA, fractional anisotropy; MD, mean diffusivity; RD, radial diffusivity

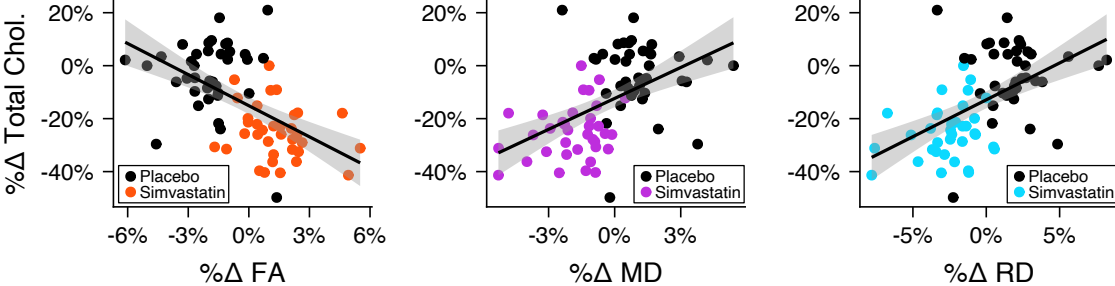

Supplement: ACN3-8-1656-s001.pdf [file ACN3-8-1656-s001.pdf]
